# Supplementary material
Source: PubMed Central journal article supplement (PMC8692072)
Supplement: NIHMS1762874-supplement-1762874_Tab_S1.pdf [file NIHMS1762874-supplement-1762874_Tab_S1.pdf]

**Table S1. Four categories of hypothesized gastric cancer etiologies for 94 study single nucleotide polymorphisms (SNPs)**

***1. Inflammation and Immunity***

| <b>Gene</b>   | <b>Chr</b> | <b>SNP</b> |
|---------------|------------|------------|
| <i>MTHFR</i>  | 1          | rs1801131  |
| <i>MTHFR</i>  | 1          | rs1801133  |
| <i>IL10</i>   | 1          | rs1800872  |
| <i>IL10</i>   | 1          | rs1800871  |
| <i>IL10</i>   | 1          | rs1800896  |
| <i>IL1B</i>   | 2          | rs1143634  |
| <i>IL1B</i>   | 2          | rs1143627  |
| <i>IL1B</i>   | 2          | rs16944    |
| <i>TLR10</i>  | 4          | rs4129009  |
| <i>TLR10</i>  | 4          | rs10004195 |
| <i>TLR10</i>  | 4          | rs12233670 |
| <i>TLR1</i>   | 4          | rs4543123  |
| <i>TLR1</i>   | 4          | rs4833095  |
| <i>TLR1</i>   | 4          | rs5743604  |
| <i>TLR1</i>   | 4          | rs17616434 |
| <i>TLR1</i>   | 4          | rs6815814  |
| <i>CXCL8</i>  | 4          | rs4073     |
| <i>IL6</i>    | 7          | rs1800797  |
| <i>IL6</i>    | 7          | rs1800795  |
| <i>NAT1</i>   | 8          | rs15561    |
| <i>MBL2</i>   | 10         | rs5030737  |
| <i>CYP2E</i>  | 10         | rs2031920  |
| <i>MTHFD1</i> | 14         | rs1950902  |
| <i>MTHFD1</i> | 14         | rs2236225  |
| <i>B9D2</i>   | 19         | rs1800469  |

***2. Oncogenesis***

| <b>Gene</b>    | <b>Chr</b> | <b>SNP</b> |
|----------------|------------|------------|
| <i>FAF1</i>    | 1          | rs1846522  |
| <i>LEPR</i>    | 1          | rs1137101  |
| <i>SELENOF</i> | 1          | rs5845     |
| <i>MUC1</i>    | 1          | rs4072037  |
| <i>GKN3P</i>   | 2          | rs10197208 |
| <i>IL1RN</i>   | 2          | rs419598   |
| <i>RPRM</i>    | 2          | rs1063728  |
| <i>GHRL</i>    | 3          | rs35683    |
| <i>ZBTB20</i>  | 3          | rs9841504  |
| <i>PRKAA1</i>  | 5          | rs13361707 |
| <i>CCDC152</i> | 5          | rs7579     |
| <i>CCDC152</i> | 5          | rs3877899  |
| <i>PGC</i>     | 6          | rs1316979  |
| <i>ESR1</i>    | 6          | rs3020314  |
| <i>SOD2</i>    | 6          | rs4880     |

|                     |    |            |
|---------------------|----|------------|
| <i>SHBG</i>         | 7  | rs799941   |
| <i>LOC105375494</i> | 7  | rs7799039  |
| <i>PSCA</i>         | 8  | rs2294008  |
| <i>TLR4</i>         | 9  | rs1927914  |
| <i>ABO</i>          | 9  | rs8176747  |
| <i>ABO</i>          | 9  | rs8176746  |
| <i>ABO</i>          | 9  | rs505922   |
| <i>ARHGAP22</i>     | 10 | rs10508902 |
| <i>CASP1</i>        | 11 | rs530537   |
| <i>ESR2</i>         | 14 | rs4986938  |
| <i>CDH1</i>         | 16 | rs16260    |
| <i>NOS2</i>         | 17 | rs2297518  |
| <i>GAST</i>         | 17 | rs7220169  |
| <i>GPX4</i>         | 19 | rs713041   |
| <i>TGFB1</i>        | 19 | rs2241715  |
| <i>SLC52A3</i>      | 20 | rs13042395 |
| <i>TFF3</i>         | 21 | rs225439   |

### **3. Environment and Nutrition**

| <b>Gene</b>    | <b>Chr</b> | <b>SNP</b> |
|----------------|------------|------------|
| <i>EPHX1</i>   | 1          | rs1801131  |
| <i>CYP1B1</i>  | 1          | rs1051740  |
| <i>CYP1B1</i>  | 2          | rs1800440  |
| <i>CYP1B1</i>  | 2          | rs1056836  |
| <i>UGT1A10</i> | 2          | rs61261057 |
| <i>UGT1A10</i> | 2          | rs17868323 |
| <i>AHR</i>     | 2          | rs11692021 |
| <i>NAT1</i>    | 7          | rs2066853  |
| <i>NAT1</i>    | 8          | rs5030839  |
| <i>NAT2</i>    | 8          | rs4986782  |
| <i>NAT2</i>    | 8          | rs1801279  |
| <i>NAT2</i>    | 8          | rs1041983  |
| <i>NAT2</i>    | 8          | rs1801280  |
| <i>NAT2</i>    | 8          | rs1799929  |
| <i>NAT2</i>    | 8          | rs1799930  |
| <i>NAT2</i>    | 8          | rs1208     |
| <i>CYP2C9</i>  | 8          | rs1799931  |
| <i>CYP1A2</i>  | 10         | rs1057910  |

### **4. Miscellaneous**

| <b>Gene</b>         | <b>Chr</b> | <b>SNP</b> |
|---------------------|------------|------------|
| <i>ODC1</i>         | 2          | rs2302615  |
| <i>GC</i>           | 4          | rs2282679  |
| <i>GC</i>           | 4          | rs4588     |
| <i>GC</i>           | 4          | rs7041     |
| <i>GC</i>           | 4          | rs1155563  |
| <i>LOC100419170</i> | 4          | rs11736691 |

|                |    |            |
|----------------|----|------------|
| <i>SLC23A1</i> | 5  | rs33972313 |
| <i>CYP2R1</i>  | 11 | rs1993116  |
| <i>CYP2R1</i>  | 11 | rs10500804 |
| <i>CYP2R1</i>  | 11 | rs12794714 |
| <i>CYP2R1</i>  | 11 | rs2060793  |
| <i>NADSYN1</i> | 11 | rs7944926  |
| <i>NADSYN1</i> | 11 | rs12800438 |
| <i>NADSYN1</i> | 11 | rs3794060  |
| <i>NADSYN1</i> | 11 | rs3829251  |
| <i>SLC23A2</i> | 20 | rs6116569  |
| <i>SLC23A2</i> | 20 | rs6133175  |
| <i>SLC23A2</i> | 20 | rs6053005  |
| <i>CYP24A1</i> | 20 | rs17217119 |
