# Supplementary material
Source: PubMed Central journal article supplement (PMC8692072)
Supplement: NIHMS1762874-supplement-1762874_Tab_S2.pdf [file NIHMS1762874-supplement-1762874_Tab_S2.pdf]

**Table S2. Single nucleotide polymorphisms (SNPs) genotyped in this gastric cancer study**

| SNP         | Chromosome | Gene           | Location  | Genic Location | Study Population MAF | AMR MAF† |
|-------------|------------|----------------|-----------|----------------|----------------------|----------|
| rs1801131   | 1          | <i>MTHFR</i>   | 11794419  | Missense       | 0.137                | 0.151    |
| rs1801133   | 1          | <i>MTHFR</i>   | 11796321  | Missense       | 0.433                | 0.474    |
| rs1846522   | 1          | <i>FAF1</i>    | 50515533  | Intron         | 0.053                | 0.086    |
| rs1137101   | 1          | <i>LEPR</i>    | 65592830  | Missense       | 0.43                 | 0.437    |
| rs5845      | 1          | <i>SELENOF</i> | 86863156  | Non Coding     | 0.186                | 0.180    |
| rs4072037*  | 1          | <i>MUC1</i>    | 155192276 | Synonymous     | 0.094                | 0.287    |
| rs1800872*  | 1          | <i>IL10</i>    | 206773062 | Upstream       | 0.387                | 0.333    |
| rs1800871   | 1          | <i>IL10</i>    | 206773289 | Upstream       | 0.383                | 0.333    |
| rs1800896   | 1          | <i>IL10</i>    | 206773552 | Upstream       | 0.211                | 0.295    |
| rs1051740   | 1          | <i>EPHX1</i>   | 225831932 | Missense       | 0.386                | 0.320    |
| rs2302615   | 2          | <i>ODC1</i>    | 10448012  | Intron         | 0.264                | 0.252    |
| rs1800440   | 2          | <i>CYP1B1</i>  | 38070996  | Missense       | 0.094                | 0.007    |
| rs1056836   | 2          | <i>CYP1B1</i>  | 38071060  | Missense       | 0.246                | 0.097    |
| rs10197208  | 2          | <i>GKN3P</i>   | 68925812  | none           | 0.359                | 0.329    |
| rs1143634   | 2          | <i>IL1B</i>    | 112832813 | Synonymous     | 0.104                | 0.125    |
| rs1143627*  | 2          | <i>IL1B</i>    | 112836810 | 5' UTR         | 0.388                | 0.447    |
| rs16944     | 2          | <i>IL1B</i>    | 112837290 | Upstream       | 0.391                | 0.450    |
| rs419598    | 2          | <i>IL1RN</i>   | 113129630 | Synonymous     | 0.349                | 0.331    |
| rs1063728   | 2          | <i>RPRM</i>    | 153477985 | 3' UTR         | 0.285                | 0.350    |
| rs61261057* | 2          | <i>UGT1A10</i> | 233682280 | Intron         | 0.0004               | 0.000    |
| rs17868323  | 2          | <i>UGT1A10</i> | 233682324 | Intron         | 0.440                | 0.493    |
| rs11692021  | 2          | <i>UGT1A10</i> | 233682559 | Intron         | 0.230                | 0.264    |
| rs35683     | 3          | <i>GHRL</i>    | 10286566  | Intron         | 0.276                | 0.329    |
| rs9841504   | 3          | <i>ZBTB20</i>  | 114643917 | Intron         | 0.257                | 0.179    |
| rs4129009   | 4          | <i>TLR10</i>   | 38773268  | Missense       | 0.107                | 0.140    |
| rs10004195* | 4          | <i>TLR10</i>   | 38783103  | Upstream       | 0.162                | 0.232    |
| rs12233670* | 4          | <i>TLR10</i>   | 38785595  | none           | 0.195                | 0.239    |
| rs4543123   | 4          | <i>TLR1</i>    | 38790903  | Downstream     | 0.188                | 0.225    |
| rs4833095*  | 4          | <i>TLR1</i>    | 38798089  | Missense       | 0.455                | 0.473    |
| rs5743604   | 4          | <i>TLR1</i>    | 38799664  | Intron         | 0.471                | 0.437    |
| rs17616434* | 4          | <i>TLR1</i>    | 38811255  | none           | 0.452                | 0.470    |

|             |   |                     |           |             |       |       |
|-------------|---|---------------------|-----------|-------------|-------|-------|
| rs6815814   | 4 | <i>TLR1</i>         | 38814717  | none        | 0.389 | 0.388 |
| rs2282679*  | 4 | <i>GC</i>           | 71742666  | Intron      | 0.204 | 0.209 |
| rs4588      | 4 | <i>GC</i>           | 71752606  | Missense    | 0.206 | 0.208 |
| rs7041      | 4 | <i>GC</i>           | 71752617  | Missense    | 0.460 | 0.463 |
| rs1155563*  | 4 | <i>GC</i>           | 71777771  | Intron      | 0.193 | 0.585 |
| rs4073      | 4 | <i>CXCL8</i>        | 73740307  | Upstream    | 0.376 | 0.386 |
| rs11736691* | 4 | <i>LOC100419170</i> | 153665441 | Intron      | 0.014 | 0.016 |
| rs13361707  | 5 | <i>PRKAA1</i>       | 40791782  | Intron      | 0.208 | 0.254 |
| rs7579      | 5 | <i>CCDC152</i>      | 42800706  | 3' UTR      | 0.499 | 0.386 |
| rs3877899   | 5 | <i>CCDC152</i>      | 42801166  | 3' UTR      | 0.131 | 0.151 |
| rs33972313* | 5 | <i>SLC23A1</i>      | 139379813 | Missense    | 0.015 | 0.022 |
| rs1316979*  | 6 | <i>PGC</i>          | 41740926  | Intron      | 0.031 | 0.048 |
| rs3020314   | 6 | <i>ESR1</i>         | 151949537 | Intron      | 0.395 | 0.441 |
| rs4880      | 6 | <i>SOD2</i>         | 159692840 | Missense    | 0.458 | 0.416 |
| rs2066853   | 7 | <i>AHR</i>          | 17339486  | Missense    | 0.153 | 0.173 |
| rs1800797*  | 7 | <i>IL6</i>          | 22726602  | Intron      | 0.138 | 0.184 |
| rs1800795   | 7 | <i>IL6</i>          | 22727026  | Intron      | 0.139 | 0.184 |
| rs799941    | 7 | <i>SHBG</i>         | 80431740  | none        | 0.054 | 0.062 |
| rs7799039   | 7 | <i>LOC105375494</i> | 128238730 | Upstream    | 0.406 | 0.435 |
| rs5030839*  | 8 | <i>NAT1</i>         | 18222606  | Stop Gained | 0.007 | 0.004 |
| rs4986782*  | 8 | <i>NAT1</i>         | 18222607  | Missense    | 0.009 | 0.004 |
| rs15561     | 8 | <i>NAT1</i>         | 18223142  | 3' UTR      | 0.429 | 0.382 |
| rs1801279*  | 8 | <i>NAT2</i>         | 18400194  | Missense    | 0.003 | 0.003 |
| rs1041983   | 8 | <i>NAT2</i>         | 18400285  | Synonymous  | 0.321 | 0.291 |
| rs1801280*  | 8 | <i>NAT2</i>         | 18400344  | Missense    | 0.281 | 0.362 |
| rs1799929   | 8 | <i>NAT2</i>         | 18400484  | Synonymous  | 0.289 | 0.344 |
| rs1799930   | 8 | <i>NAT2</i>         | 18400593  | Missense    | 0.187 | 0.352 |
| rs1208*     | 8 | <i>NAT2</i>         | 18400806  | Missense    | 0.305 | 0.373 |
| rs1799931   | 8 | <i>NAT2</i>         | 18400860  | Missense    | 0.128 | 0.112 |
| rs2294008   | 8 | <i>PSCA</i>         | 142680513 | Intron      | 0.322 | 0.496 |
| rs1927914   | 9 | <i>TLR4</i>         | 117702447 | Upstream    | 0.365 | 0.380 |
| rs8176747*  | 9 | <i>ABO</i>          | 133255928 | Missense    | 0.046 | 0.048 |
| rs8176746*  | 9 | <i>ABO</i>          | 133255935 | Missense    | 0.047 | 0.476 |

|             |    |                 |           |            |       |       |
|-------------|----|-----------------|-----------|------------|-------|-------|
| rs505922    | 9  | <i>ABO</i>      | 133273813 | Intron     | 0.219 | 0.276 |
| rs10508902  | 10 | <i>ARHGAP22</i> | 48433138  | Intron     | 0.324 | 0.256 |
| rs5030737*  | 10 | <i>MBL2</i>     | 52771482  | Missense   | 0.025 | 0.033 |
| rs1057910   | 10 | <i>CYP2C9</i>   | 94981296  | Missense   | 0.026 | 0.038 |
| rs2031920   | 10 | <i>CYP2E1</i>   | 133526341 | Upstream   | 0.145 | 0.115 |
| rs1993116*  | 11 | <i>CYP2R1</i>   | 14888688  | Intron     | 0.318 | 0.282 |
| rs10500804* | 11 | <i>CYP2R1</i>   | 14888727  | Intron     | 0.477 | 0.484 |
| rs12794714  | 11 | <i>CYP2R1</i>   | 14892029  | Synonymous | 0.481 | 0.486 |
| rs2060793   | 11 | <i>CYP2R1</i>   | 14893764  | 5' UTR     | 0.327 | 0.298 |
| rs7944926*  | 11 | <i>NADSYN1</i>  | 71454579  | Intron     | 0.450 | 0.450 |
| rs12800438  | 11 | <i>NADSYN1</i>  | 71459957  | Intron     | 0.460 | 0.465 |
| rs3794060*  | 11 | <i>NADSYN1</i>  | 71476633  | Intron     | 0.448 | 0.451 |
| rs3829251   | 11 | <i>NADSYN1</i>  | 71483513  | Intron     | 0.249 | 0.232 |
| rs530537    | 11 | <i>CASP1</i>    | 105027786 | Intron     | 0.499 | 0.438 |
| rs4986938   | 14 | <i>ESR2</i>     | 64233098  | Non Coding | 0.205 | 0.257 |
| rs1950902   | 14 | <i>MTHFD1</i>   | 64415662  | Missense   | 0.073 | 0.089 |
| rs2236225   | 14 | <i>MTHFD1</i>   | 64442127  | Missense   | 0.373 | 0.455 |
| rs762551    | 15 | <i>CYP1A2</i>   | 74749576  | Intron     | 0.236 | 0.242 |
| rs16260     | 16 | <i>CDH1</i>     | 68737131  | Upstream   | 0.266 | 0.248 |
| rs2297518   | 17 | <i>NOS2</i>     | 27769571  | Missense   | 0.137 | 0.174 |
| rs7220169   | 17 | <i>GAST</i>     | 41715448  | Synonymous | 0.219 | 0.184 |
| rs713041    | 19 | <i>GPX4</i>     | 1106616   | Synonymous | 0.386 | 0.343 |
| rs2241715*  | 19 | <i>TGFB1</i>    | 41350981  | Intron     | 0.497 | 0.471 |
| rs1800469   | 19 | <i>B9D2</i>     | 41354391  | Downstream | 0.500 | 0.453 |
| rs13042395  | 20 | <i>SLC52A3</i>  | 773867    | Intron     | 0.053 | 0.046 |
| rs6116569   | 20 | <i>SLC23A2</i>  | 4884071   | Intron     | 0.476 | 0.494 |
| rs6133175   | 20 | <i>SLC23A2</i>  | 4911113   | Intron     | 0.353 | 0.353 |
| rs6053005   | 20 | <i>SLC23A2</i>  | 4977054   | Intron     | 0.379 | 0.360 |
| rs17217119  | 20 | <i>CYP24A1</i>  | 54126051  | none       | 0.454 | 0.360 |
| rs225439    | 21 | <i>TFF3</i>     | 42311295  | Downstream | 0.382 | 0.471 |

\*Removed from final analysis: Not in HWE, MAF<0.5 and/or in LD

†MAF of the Ad Mixed American population in the 1000 genomes reference

Minor Allele Frequency (MAF)
