# Supplementary material
Source: PubMed Central journal article supplement (PMC8692072)
Supplement: NIHMS1762874-supplement-1762874_Tab_S3.pdf [file NIHMS1762874-supplement-1762874_Tab_S3.pdf]

**Supplemental Table 3. SNPs Removed From Each Linkage Disequilibrium Pair**

| SNP        | Chromosome | Gene           | Location  | Genic Location | In LD With | R <sup>2</sup> |
|------------|------------|----------------|-----------|----------------|------------|----------------|
| rs1800872  | 1          | <i>IL10</i>    | 206773062 | Upstream       | rs1800871  | 0.992          |
| rs1143627  | 2          | <i>IL1B</i>    | 112836810 | 5- UTR         | rs16944    | 0.994          |
| rs10004195 | 4          | <i>TLR10</i>   | 38783103  | Upstream       | rs12233670 | 0.904          |
| rs12233670 | 4          | <i>TLR10</i>   | 38785595  | none           | rs4543123  | 0.943          |
| rs4833095  | 4          | <i>TLR1</i>    | 38798089  | Missense       | rs5743604  | 0.965          |
| rs17616434 | 4          | <i>TLR1</i>    | 38811255  | none           | rs5743604  | 0.944          |
| rs2282679  | 4          | <i>GC</i>      | 71742666  | Intron         | rs4588     | 0.984          |
| rs1155563  | 4          | <i>GC</i>      | 71777771  | Intron         | rs4588     | 0.938          |
| rs1800797  | 7          | <i>IL6</i>     | 22726602  | Intron         | rs1800795  | 0.995          |
| rs1801280  | 8          | <i>NAT2</i>    | 18400344  | Missense       | rs1799929  | 0.973          |
| rs1208     | 8          | <i>NAT2</i>    | 18400806  | Missense       | rs1799929  | 0.951          |
| rs1993116  | 11         | <i>CYP2R1</i>  | 14888688  | Intron         | rs2060793  | 0.974          |
| rs10500804 | 11         | <i>CYP2R1</i>  | 14888727  | Intron         | rs12794714 | 0.993          |
| rs7944926  | 11         | <i>NADSYN1</i> | 71454579  | Intron         | rs12800438 | 0.979          |
| rs3794060  | 11         | <i>NADSYN1</i> | 71476633  | Intron         | rs12800438 | 0.978          |
| rs2241715  | 19         | <i>TGRB1</i>   | 41350981  | Intron         | rs1800469  | -0.991         |

**Notes:** LD, linkage disequilibrium
