# Supplementary material
Source: PubMed Central journal article supplement (PMC8692072)
Supplement: NIHMS1762874-supplement-1762874_Tab_S4.pdf [file NIHMS1762874-supplement-1762874_Tab_S4.pdf]

**Table S4. Unadjusted associations of single nucleotide polymorphisms (SNPs) with Gastric Cancer Risk**

| Chromosome | SNP              | Gene                 | OR (95% CI)              | p-value       |
|------------|------------------|----------------------|--------------------------|---------------|
| 1          | rs1801131        | <i>MTHFR</i>         | 1.03 (0.83, 1.27)        | 0.824         |
| 1          | rs1801133        | <i>MTHFR</i>         | 1.18 (1.01, 1.36)        | 0.037         |
| 1          | rs1846522        | <i>FAF1</i>          | 0.87 (0.63, 1.21)        | 0.411         |
| 1          | rs1137101        | <i>LEPR</i>          | 0.96 (0.82, 1.21)        | 0.619         |
| 1          | rs5845           | <i>SELENOF</i>       | 0.96 (0.79, 1.16)        | 0.648         |
| 1          | rs1800871        | <i>IL10</i>          | 1.05 (0.90, 1.22)        | 0.571         |
| 1          | rs1800896        | <i>IL10</i>          | 1.01 (0.84, 1.20)        | 0.945         |
| 1          | rs1051740        | <i>EPHX1</i>         | 0.98 (0.84, 1.15)        | 0.837         |
| 2          | rs2302615        | <i>ODC1</i>          | 1.21 (1.14, 1.80)        | 0.027         |
| <b>2</b>   | <b>rs1800440</b> | <b><i>CYP1B1</i></b> | <b>1.40 (1.08, 1.81)</b> | <b>0.011</b>  |
| <b>2</b>   | <b>rs1056836</b> | <b><i>CYP1B1</i></b> | <b>1.33 (1.12, 1.29)</b> | <b>0.001</b>  |
| 2          | rs10197208       | <i>GKN3P</i>         | 0.96 (0.82, 1.12)        | 0.587         |
| 2          | rs1143634        | <i>IL1B</i>          | 1.10 (0.86, 1.42)        | 0.438         |
| 2          | rs16944          | <i>IL1B</i>          | 0.89 (0.76, 1.03)        | 0.118         |
| 2          | rs419598         | <i>IL1RN</i>         | 1.02 (0.87, 1.19)        | 0.811         |
| 2          | rs1063728        | <i>RPRM</i>          | 1.00 (0.85, 1.18)        | 0.998         |
| 2          | rs61261057       | <i>UGT1A10</i>       | NA                       | 0.303         |
| 2          | rs17868323       | <i>UGT1A10</i>       | 1.10 (0.95, 1.28)        | 0.209         |
| 2          | rs11692021       | <i>UGT1A10</i>       | 1.18 (0.98, 1.40)        | 0.08          |
| <b>3</b>   | <b>rs35683</b>   | <b><i>GHRL</i></b>   | <b>1.23 (1.04, 1.45)</b> | <b>0.015</b>  |
| 3          | rs9841504        | <i>ZBTB20</i>        | 0.89 (0.75, 1.05)        | 0.173         |
| <b>4</b>   | <b>rs4129009</b> | <b><i>TLR10</i></b>  | <b>1.36 (1.07, 1.75)</b> | <b>0.014</b>  |
| 4          | rs4543123        | <i>TLR1</i>          | 1.24 (1.02, 1.49)        | 0.031         |
| 4          | rs5743604        | <i>TLR1</i>          | 0.92 (0.79, 1.06)        | 0.25          |
| 4          | rs6815814        | <i>TLR1</i>          | 1.05 (0.90, 1.22)        | 0.546         |
| 4          | rs4588           | <i>GC</i>            | 0.94 (0.78, 1.13)        | 0.512         |
| 4          | rs7041           | <i>GC</i>            | 0.98 (0.84, 1.14)        | 0.788         |
| 4          | rs4073           | <i>CXCL8</i>         | 1.06 (0.91, 1.24)        | 0.445         |
| 5          | rs13361707       | <i>PRKAA1</i>        | 1.23 (1.02, 1.49)        | 0.029         |
| 5          | rs7579           | <i>CCDC152</i>       | 1.02 (0.87, 1.18)        | 0.846         |
| 5          | rs3877599        | <i>CCDC152</i>       | 0.87 (0.87, 1.18)        | 0.233         |
| 6          | rs3020314        | <i>ESR1</i>          | 0.99 (0.85, 1.15)        | 0.869         |
| 6          | rs4880           | <i>SOD2</i>          | 1.16 (1.00, 1.36)        | 0.054         |
| 7          | rs2066853        | <i>AHR</i>           | 1.04 (0.84, 1.27)        | 0.728         |
| 7          | rs1800795        | <i>IL6</i>           | 1.03 (0.83, 1.28)        | 0.778         |
| 7          | rs7799039        | <i>LOC105375494</i>  | 1.07 (0.91, 1.23)        | 0.424         |
| 8          | rs15561          | <i>NAT1</i>          | 1.05 (0.90, 1.23)        | 0.532         |
| 8          | rs1041983        | <i>NAT2</i>          | 0.93 (0.80, 1.09)        | 0.37          |
| 8          | rs1799929        | <i>NAT2</i>          | 1.07 (0.91, 1.27)        | 0.405         |
| 8          | rs1799930        | <i>NAT2</i>          | 1.07 (0.88, 1.28)        | 0.517         |
| 8          | rs1799931        | <i>NAT2</i>          | 0.81 (0.64, 1.01)        | 0.066         |
| <b>8</b>   | <b>rs2294008</b> | <b><i>PSC4</i></b>   | <b>1.24 (1.06, 1.46)</b> | <b>0.009</b>  |
| <b>9</b>   | <b>rs1927914</b> | <b><i>TLR4</i></b>   | <b>0.75 (0.65, 0.88)</b> | <b>0.0004</b> |
| 9          | rs505922         | <i>ABO</i>           | 0.93 (0.78, 1.11)        | 0.406         |

|           |                 |                     |                          |               |
|-----------|-----------------|---------------------|--------------------------|---------------|
| 10        | rs10508902      | <i>ARHGAP22</i>     | 0.97 (0.83, 1.14)        | 0.711         |
| 10        | rs2031920       | <i>CYP2E1</i>       | 0.92 (0.75, 1.14)        | 0.431         |
| 11        | rs12794714      | <i>CYP2R1</i>       | 1.04 (0.90, 1.21)        | 0.583         |
| 11        | rs2060793       | <i>CYP2R1</i>       | 1.00 (0.85, 1.17)        | 0.971         |
| 11        | rs12800438      | <i>NADSYN1</i>      | 0.87 (0.75, 1.01)        | 0.069         |
| 11        | rs3829251       | <i>NADSYN1</i>      | 1.16 (0.97, 1.38)        | 0.104         |
| <b>11</b> | <b>rs530537</b> | <b><i>CASP1</i></b> | <b>0.77 (0.66, 0.90)</b> | <b>0.0007</b> |
| 14        | rs4986938       | <i>ESR2</i>         | 1.14 (0.96, 1.39)        | 0.133         |
| 14        | rs1950902       | <i>MTHFD1</i>       | 1.11 (0.83, 1.50)        | 0.469         |
| 14        | rs2236225       | <i>MTHFD1</i>       | 0.93 (0.80, 1.08)        | 0.349         |
| 15        | rs762551        | <i>CYP1A</i>        | 0.91 (0.75, 1.08)        | 0.268         |
| 16        | rs16260         | <i>CDH1</i>         | 1.18 (0.99, 1.39)        | 0.053         |
| 17        | rs2297518       | <i>NOS2</i>         | 0.93 (0.75, 1.15)        | 0.498         |
| 17        | rs7220169       | <i>GAST</i>         | 1.05 (0.88, 1.26)        | 0.584         |
| 19        | rs713041        | <i>GPX4</i>         | 0.94 (0.81, 1.10)        | 0.442         |
| 19        | rs1800469       | <i>B9D2</i>         | 1.09 (0.78, 1.06)        | 0.249         |
| 20        | rs13042395      | <i>SLC52A3</i>      | 1.25 (0.89, 1.75)        | 0.2           |
| 20        | rs6116569       | <i>SLC52A2</i>      | 1.10 (0.95, 1.28)        | 0.221         |
| 20        | rs6133175       | <i>SLC52A2</i>      | 0.98 (0.84, 1.15)        | 0.829         |
| 20        | rs6053005       | <i>SLC52A2</i>      | 0.92 (0.78, 1.08)        | 0.321         |
| 20        | rs17217119      | <i>CYP24A1</i>      | 1.05 (0.90, 1.23)        | 0.54          |
| 21        | rs225439        | <i>TFF3</i>         | 0.91 (0.78, 1.07)        | 0.255         |

Bolded SNPs passed False Discovery Rate (FDR) cut off
