# Supplementary material
Source: PubMed Central journal article supplement (PMC8692072)
Supplement: NIHMS1762874-supplement-1762874_Tab_S5.pdf [file NIHMS1762874-supplement-1762874_Tab_S5.pdf]

**Table S5. Age, sex and cagA-adjusted associations of single nucleotide polymorphisms (SNPs)**

| Chromosome | SNP              | Gene                 | OR (95% CI)*       | p-value      |
|------------|------------------|----------------------|--------------------|--------------|
| 1          | rs1801131        | <i>MTHFR</i>         |                    | 0.871        |
| <b>1</b>   | <b>rs1801133</b> | <b><i>MTHFR</i></b>  | <b>1.19 (1.00,</b> | <b>0.047</b> |
| 1          | rs1846522        | <i>FAF1</i>          |                    | 0.242        |
| 1          | rs1137101        | <i>LEPR</i>          |                    | 0.716        |
| 1          | rs5845           | <i>SELENOF</i>       |                    | 0.597        |
| 1          | rs1800871        | <i>IL10</i>          |                    | 0.81         |
| 1          | rs1800896        | <i>IL10</i>          |                    | 0.815        |
| <b>2</b>   | <b>rs2302615</b> | <b><i>ODC1</i></b>   | <b>1.36 (1.05,</b> | <b>0.018</b> |
| <b>2</b>   | <b>rs1800440</b> | <b><i>CYPTB1</i></b> | <b>0.74 (0.55,</b> | <b>0.04</b>  |
| <b>2</b>   | <b>rs1056836</b> | <b><i>CYPTB1</i></b> | <b>0.81 (0.66,</b> | <b>0.036</b> |
| 2          | rs10197208       | <i>GKN3P</i>         |                    | 0.796        |
| 2          | rs1143634        | <i>IL1B</i>          |                    | 0.228        |
| 2          | rs1143627        | <i>IL1B</i>          |                    | 0.473        |
| 2          | rs16944          | <i>IL1B</i>          |                    | 0.411        |
| 2          | rs419598         | <i>IL1RN</i>         |                    | 0.836        |
| 2          | rs1063728        | <i>RPRM</i>          |                    | 0.815        |
| 2          | rs61261057       | <i>UGT1A10</i>       |                    | 0.971        |
| 2          | rs17868323       | <i>UGT1A10</i>       |                    | 0.384        |
| 2          | rs11692021       | <i>UGT1A10</i>       |                    | 0.435        |
| <b>3</b>   | <b>rs35683</b>   | <b><i>GHRL</i></b>   | <b>1.17 (1.05,</b> | <b>0.096</b> |
| 3          | rs9841504        | <i>ZBTB20</i>        |                    | 0.156        |
| <b>4</b>   | <b>rs4129009</b> | <b><i>TLR10</i></b>  | <b>0.79 (0.59,</b> | <b>0.089</b> |
| 4          | rs4543123        | <i>TLR1</i>          |                    | 0.334        |
| 4          | rs5743604        | <i>TLR1</i>          |                    | 0.48         |
| 4          | rs6815814        | <i>TLR1</i>          |                    | 0.809        |
| 4          | rs4588           | <i>GC</i>            |                    | 0.755        |
| 4          | rs7041           | <i>GC</i>            |                    | 0.791        |
| 4          | rs4073           | <i>CXCL8</i>         |                    | 0.942        |
| <b>5</b>   | <b>rs1336170</b> | <b><i>PRKAA1</i></b> | <b>1.24 (1.00,</b> | <b>0.048</b> |
| 5          | rs7579           | <i>CCDC152</i>       |                    | 0.751        |
| 5          | rs3877899        | <i>CCDC152</i>       |                    | 0.402        |
| 6          | rs3020314        | <i>ESR1</i>          |                    | 0.652        |
| 6          | rs4880           | <i>SOD2</i>          |                    | 0.146        |
| 7          | rs2066853        | <i>AHR</i>           |                    | 0.521        |
| 7          | rs1800795        | <i>IL6</i>           |                    | 0.477        |
| 8          | rs5030839        | <i>NAT1</i>          |                    | 0.351        |
| 8          | rs15561          | <i>NAT1</i>          |                    | 0.687        |
| 8          | rs1041983        | <i>NAT2</i>          |                    | 0.133        |
| 8          | rs1799929        | <i>NAT2</i>          |                    | 0.255        |
| 8          | rs1799930        | <i>NAT2</i>          |                    | 0.669        |
| 8          | rs1799931        | <i>CYP2C9</i>        |                    | 0.198        |
| 8          | rs2294008        | <i>PSCA</i>          |                    | 0.197        |
| <b>9</b>   | <b>rs1927914</b> | <b><i>TLR4</i></b>   | <b>1.23 (1.03,</b> | <b>0.021</b> |
| 9          | rs505922         | <i>ABO</i>           |                    | 0.357        |
| 10         | rs10508902       | <i>ARHGAP22</i>      |                    | 0.995        |

|           |                  |                |                    |              |
|-----------|------------------|----------------|--------------------|--------------|
| 10        | rs2031920        | <i>CYP2E1</i>  |                    | 0.332        |
| 11        | rs12794714       | <i>CYPR1</i>   |                    | 0.33         |
| 11        | rs2060793        | <i>CYPR1</i>   |                    | 0.552        |
| 11        | rs12800438       | <i>NADSYN1</i> |                    | 0.304        |
| 11        | rs3829251        | <i>NADSYN1</i> |                    | 0.173        |
| <b>11</b> | <b>rs530537</b>  | <b>CASP1</b>   | <b>1.23 (1.03,</b> | <b>0.019</b> |
| <b>14</b> | <b>rs4986938</b> | <b>ESR2</b>    | <b>1.22 (0.99,</b> | <b>0.068</b> |
| 14        | rs1950902        | <i>MTHFD1</i>  |                    | 0.617        |
| 14        | rs2236225        | <i>MTHFD1</i>  |                    | 0.526        |
| 15        | rs762551         | <i>CYP1A2</i>  |                    | 0.611        |
| 16        | rs16260          | <i>CDH1</i>    |                    | 0.225        |
| 17        | rs2297518        | <i>NOS2</i>    |                    | 0.913        |
| 17        | rs7220169        | <i>GAST</i>    |                    | 1            |
| 19        | rs713041         | <i>GPX4</i>    |                    | 0.898        |
| 19        | rs1800469        | <i>B9D2</i>    |                    | 0.902        |
| <b>20</b> | <b>rs1304239</b> | <b>SLC52A3</b> | <b>1.38 (0.95,</b> | <b>0.094</b> |
| 20        | rs6116569        | <i>SLC23A2</i> |                    | 0.393        |
| 20        | rs6133175        | <i>SLC23A2</i> |                    | 0.692        |
| 20        | rs6053005        | <i>SLC23A2</i> |                    | 0.387        |
| 20        | rs17217119       | <i>CYP24A1</i> |                    | 0.539        |
| 21        | rs225439         | <i>TFF3</i>    |                    | 0.182        |

\*Odds ratio only included if p < 0.10 (in bold)
