# Supplementary material
Source: PubMed Central journal article supplement (PMC8692072)
Supplement: NIHMS1762874-supplement-1762874_Tab_S6.pdf [file NIHMS1762874-supplement-1762874_Tab_S6.pdf]

**Table S6. Associations of *ODC1* (rs2302615) SNP with gastric cancer risk in stratified analyses**

| <b>Stratification</b>   | <b>Unadjusted OR (95% CI)</b> | <b>p-value</b> |
|-------------------------|-------------------------------|----------------|
| <b><i>TLR4</i> = TT</b> | <b>1.77 (1.24, 2.55)</b>      | <b>0.002</b>   |
| <i>CASP1</i> = AA       | 1.78 (1.09, 2.94)             | 0.023          |

• Bolded SNPs pass FDR cut off ( $p < 0.021$ )
